# Supplementary material for: Memory recall involves a transient break in excitatory-inhibitory balance
Source: eLife journal article supplement (doi:10.7554/elife.70071), 2021-10-08

**A****Control ROI in parietal-occipital cortex**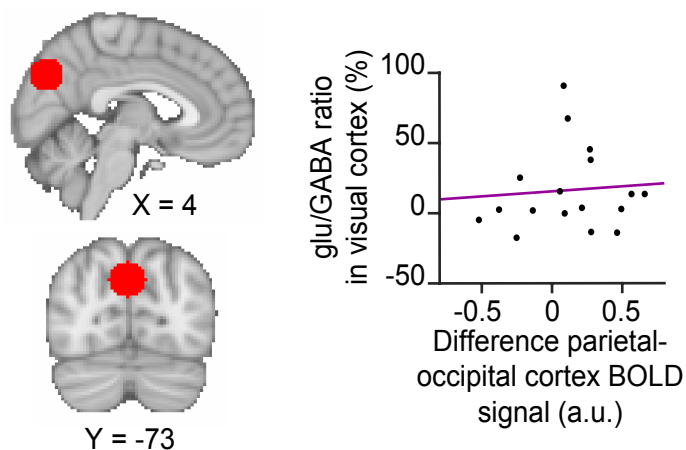**B****Control ROI in brainstem**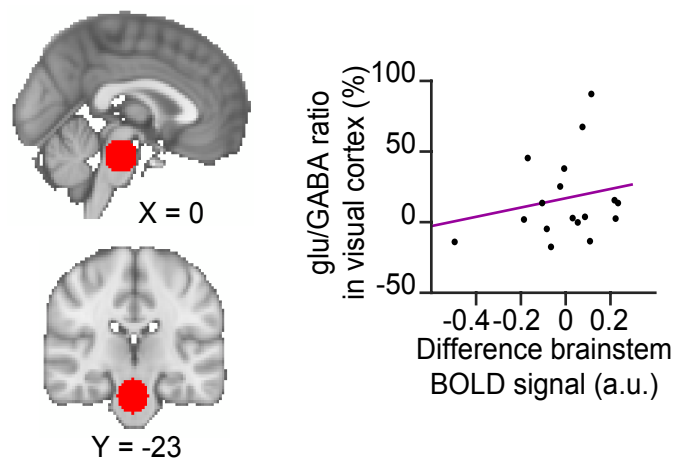**'Remembered'/'Forgotten' (%)**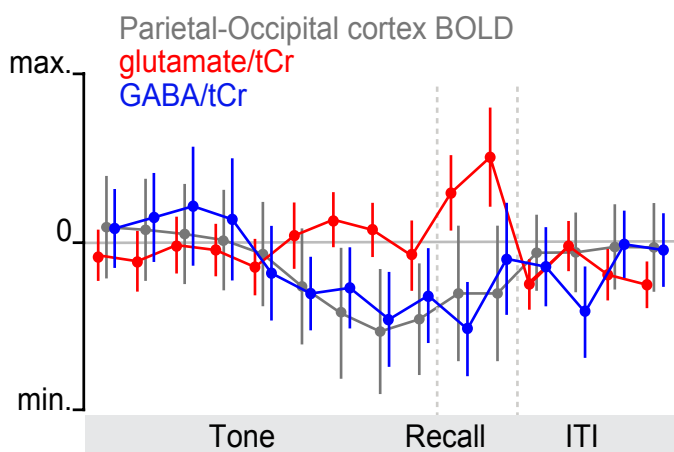**'Remembered'/'Forgotten' (%)**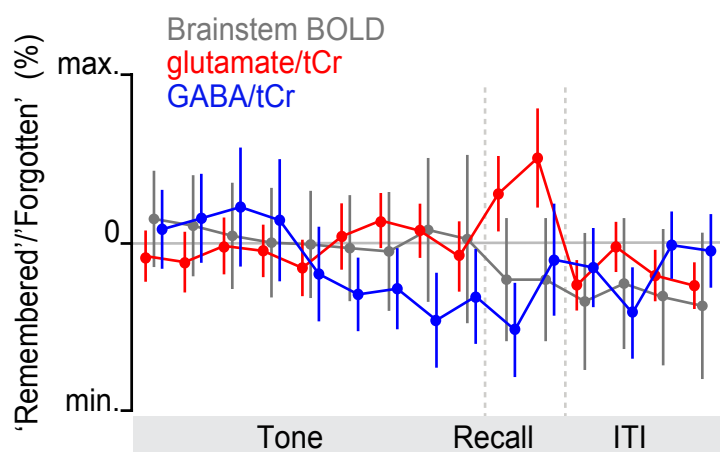**C**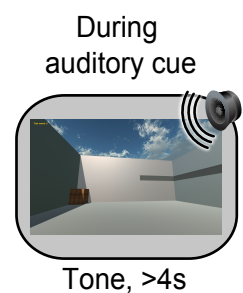**BOLD signal versus glu/GABA ratio for 'Remembered:Forgotten'**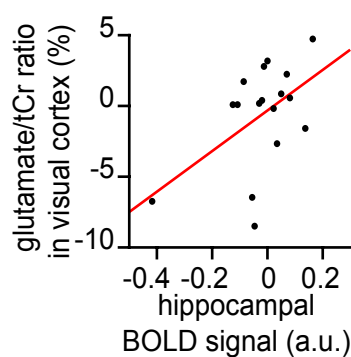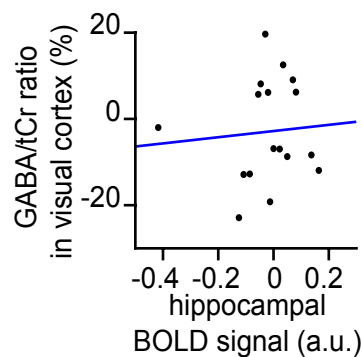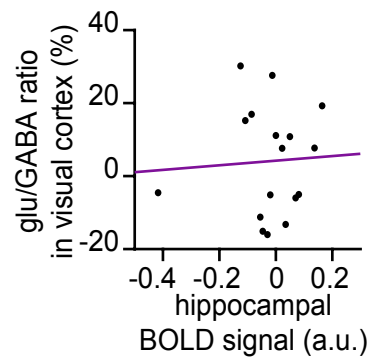**D**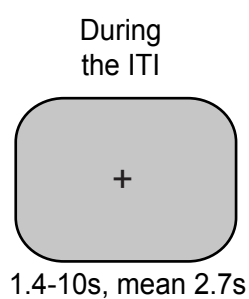**BOLD signal versus glu/GABA ratio for 'Remembered:Forgotten'**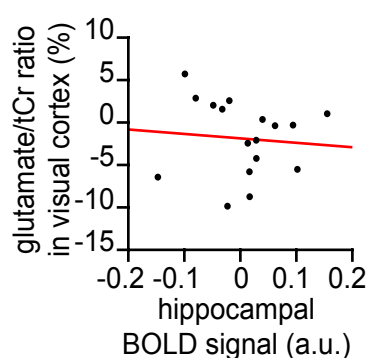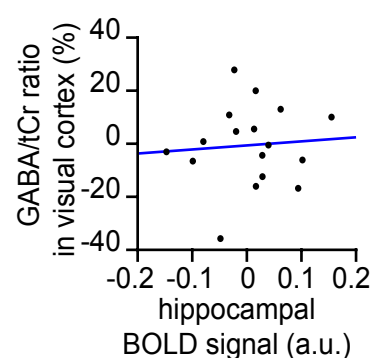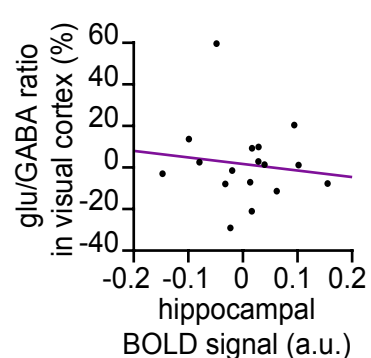

Supplement: supp [file elife_poa_e70071_Figure_5_figure_supplement_1.pdf › elife_poa_e70071_Figure_5_figure_supplement_1.pdf]
