# Supplementary figures and images for: Memory recall involves a transient break in excitatory-inhibitory balance
Source: eLife journal article supplement (doi:10.7554/elife.70071), 2021-10-08

**A**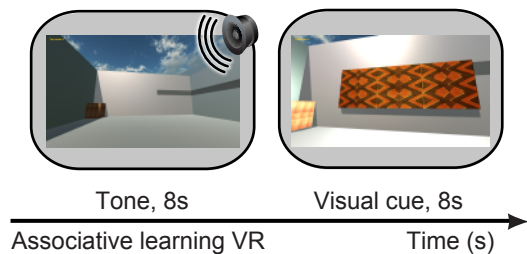**B**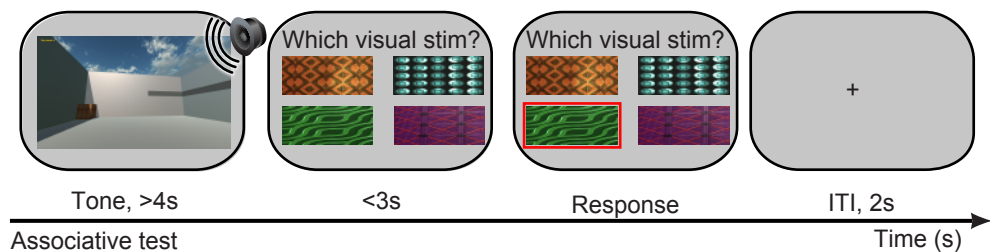**C**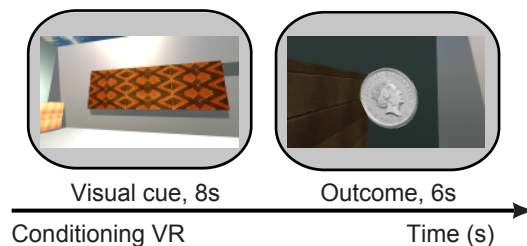**D**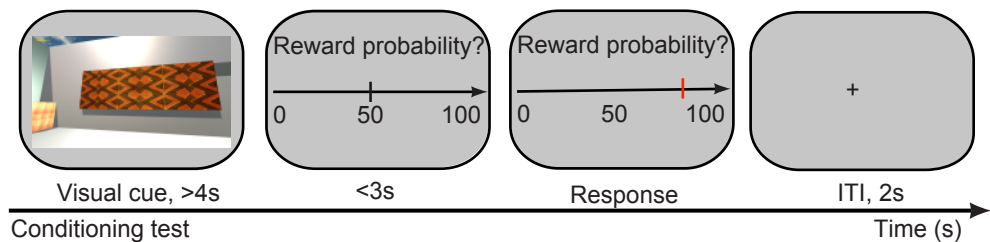**E**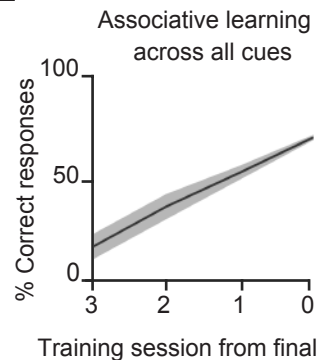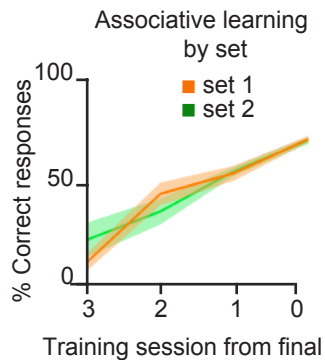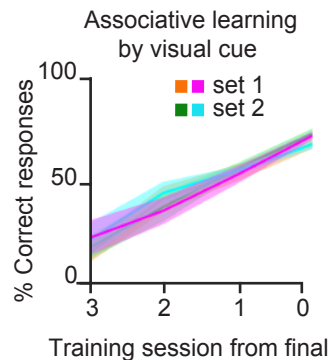**F**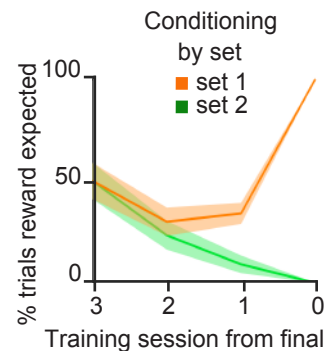

Supplement: supp [file elife_poa_e70071_Figure_1_figure_supplement_1.pdf › elife_poa_e70071_Figure_1_figure_supplement_1.pdf]

**A**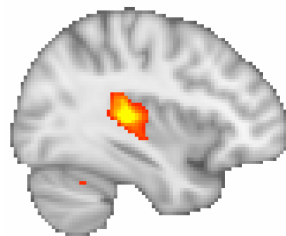 $X = -36$ 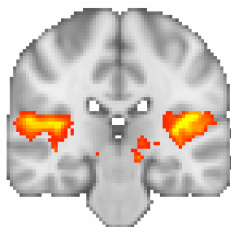 $Y = -26$ **B**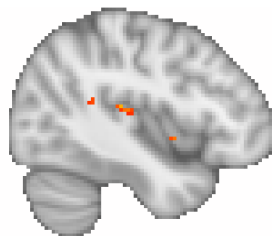 $X = -42$ 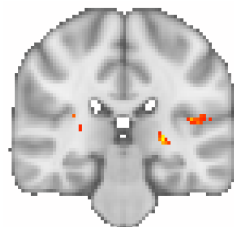 $Y = -28$ **C**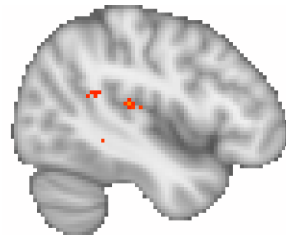 $X = -44$ 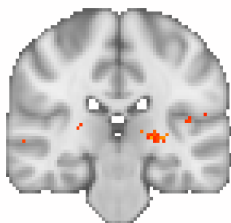 $Y = -26$ **D**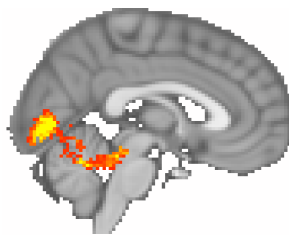 $X = 2$ 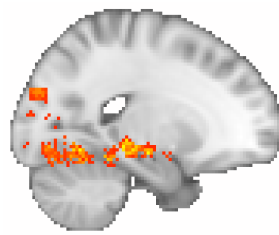 $X = -19$

Supplement: supp [file elife_poa_e70071_Figure_3_figure_supplement_1.pdf › elife_poa_e70071_Figure_3_figure_supplement_1.pdf]

# Schematic showing time bins used to estimate moving average

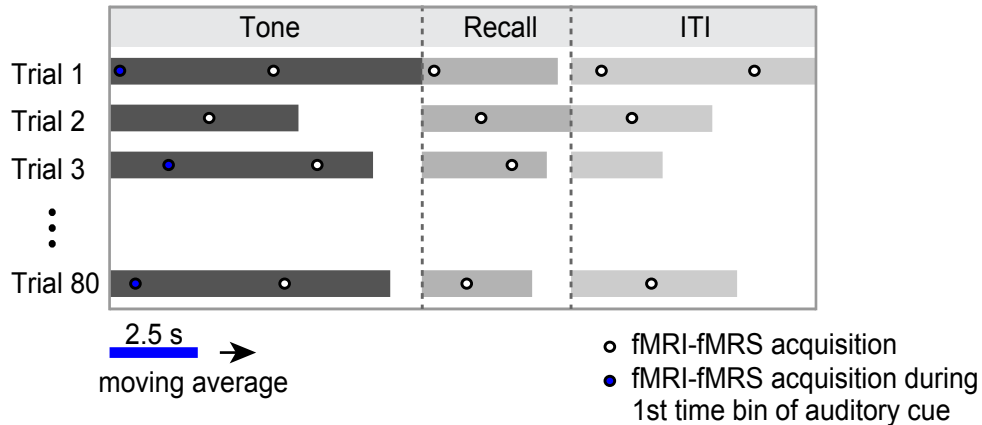

Supplement: supp [file elife_poa_e70071_Figure_4_figure_supplement_1.pdf › elife_poa_e70071_Figure_4_figure_supplement_1.pdf]

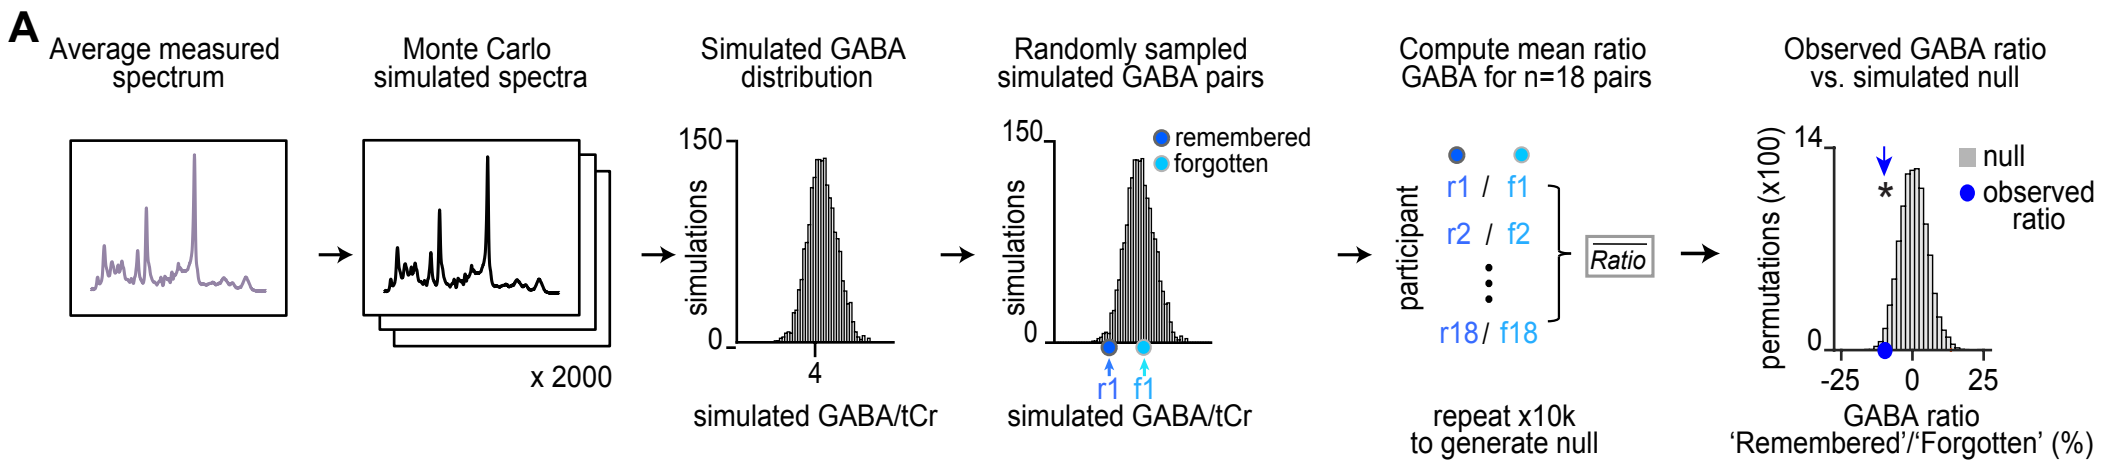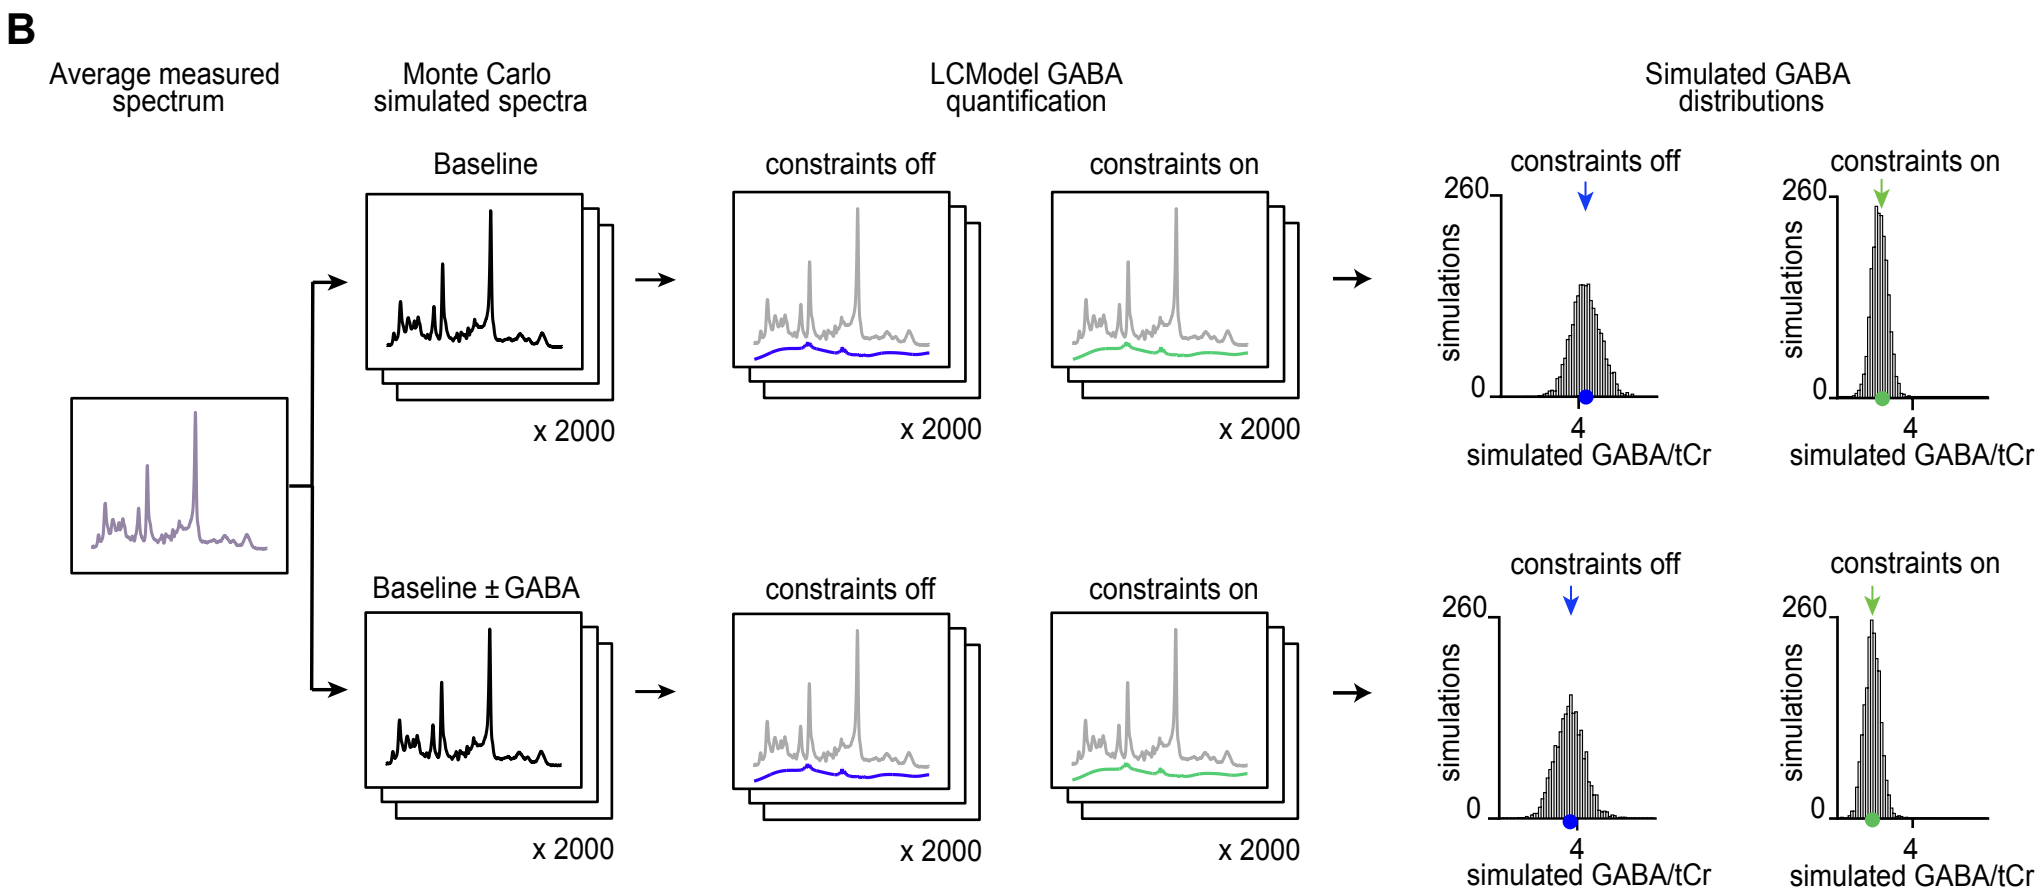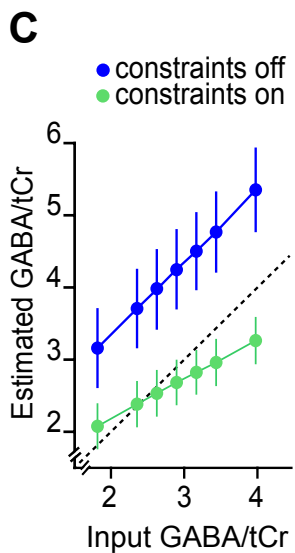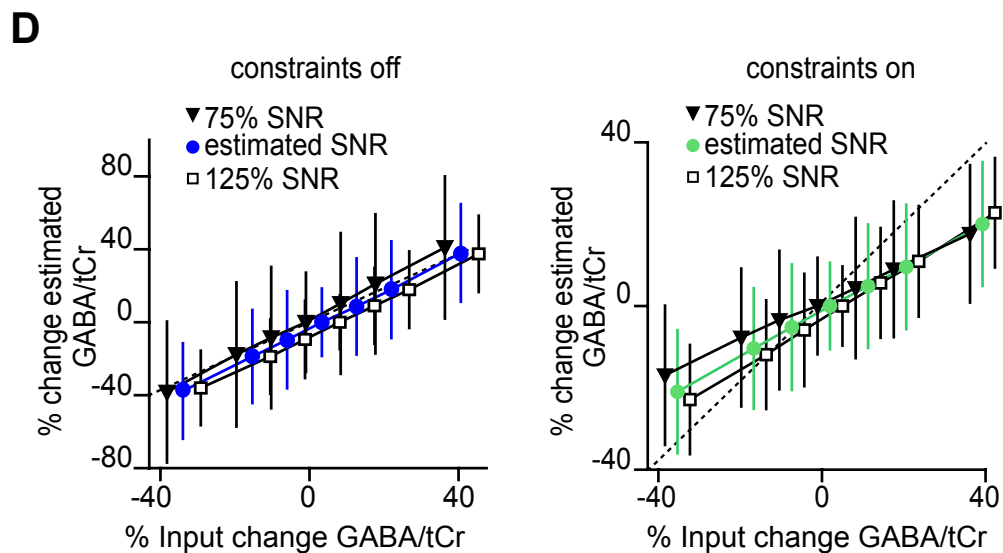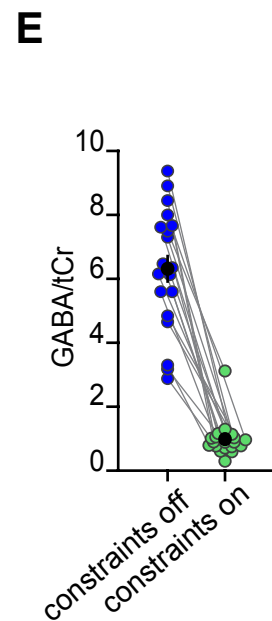

Supplement: supp [file elife_poa_e70071_Figure_4_figure_supplement_2.pdf › elife_poa_e70071_Figure_4_figure_supplement_2.pdf]

**A**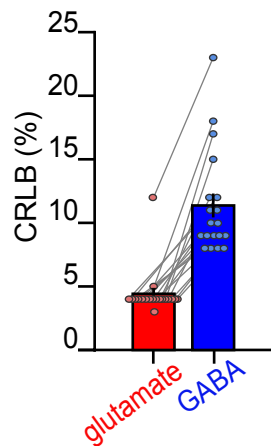**B**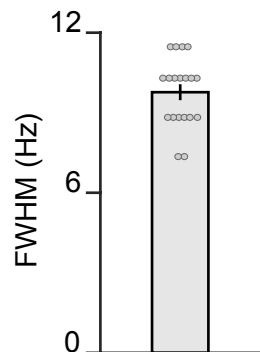**C**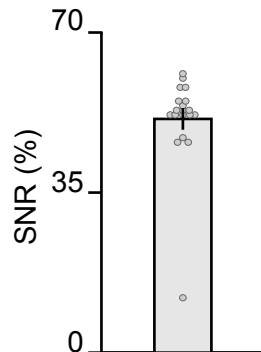**D**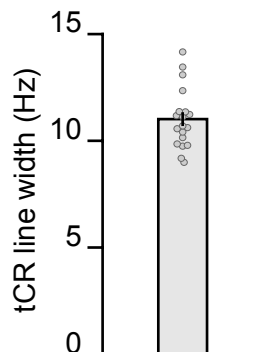**E**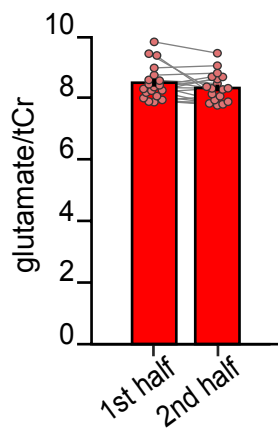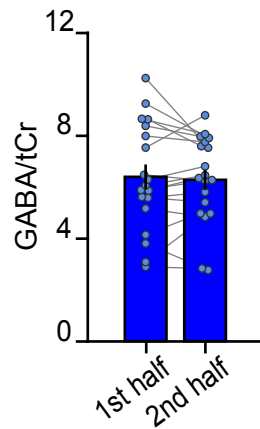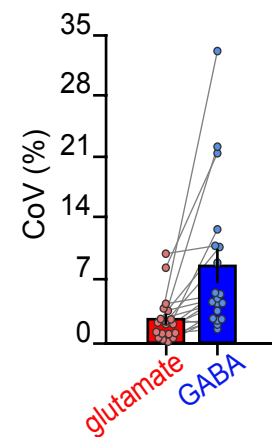

Supplement: supp [file elife_poa_e70071_Figure_4_figure_supplement_3.pdf › elife_poa_e70071_Figure_4_figure_supplement_3.pdf]

**A**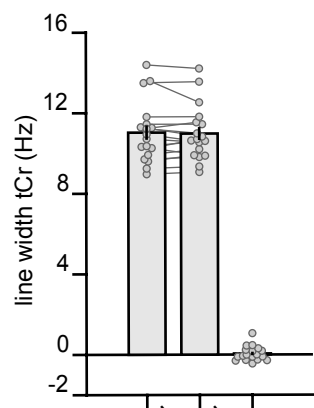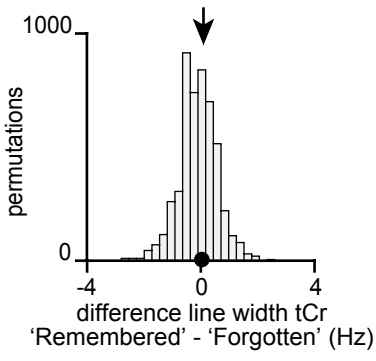**B**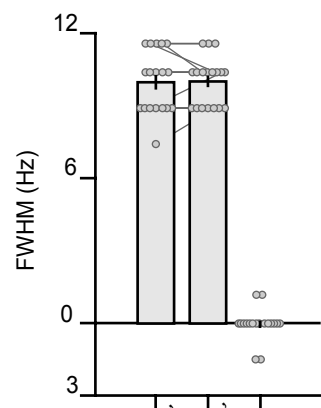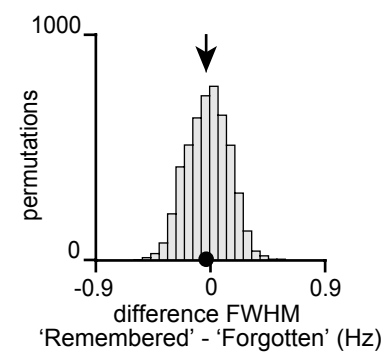**C**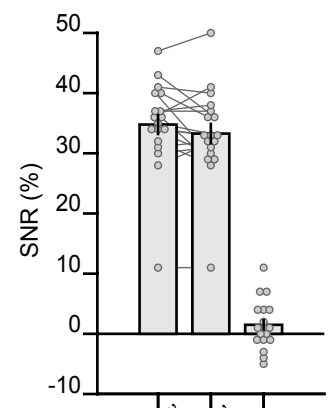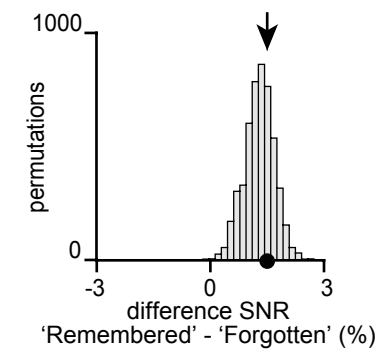**D**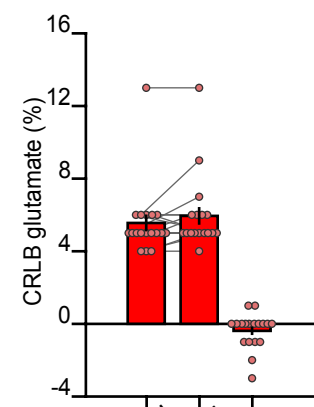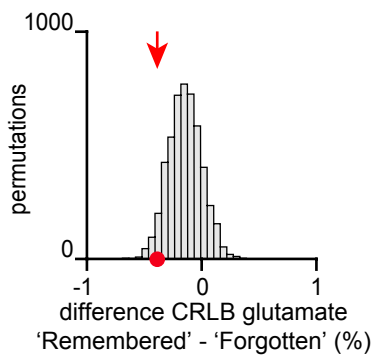**E**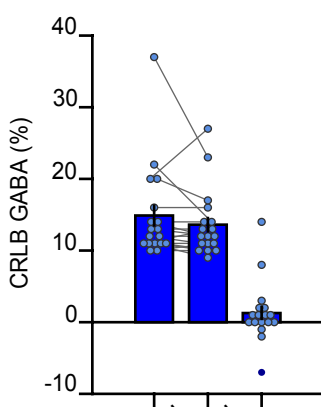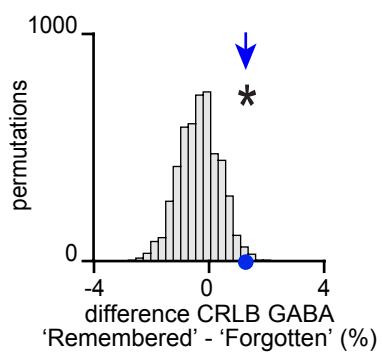**F**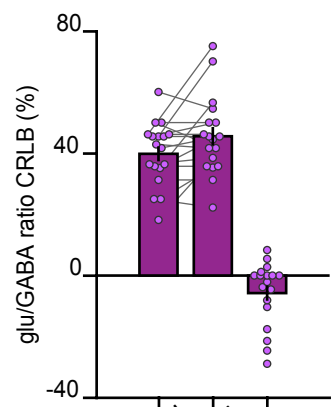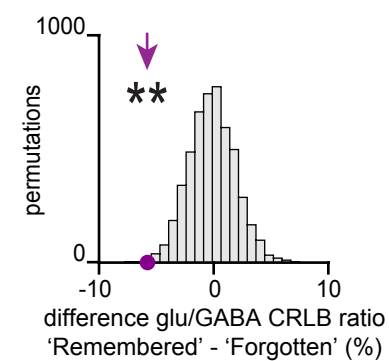

Supplement: supp [file elife_poa_e70071_Figure_4_figure_supplement_4.pdf › elife_poa_e70071_Figure_4_figure_supplement_4.pdf]

**A**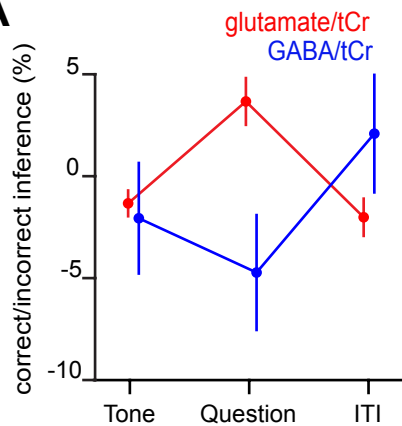**C**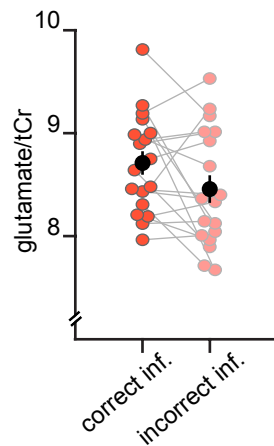**D**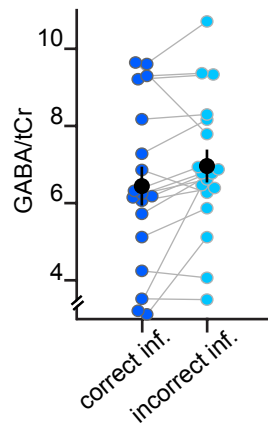**E**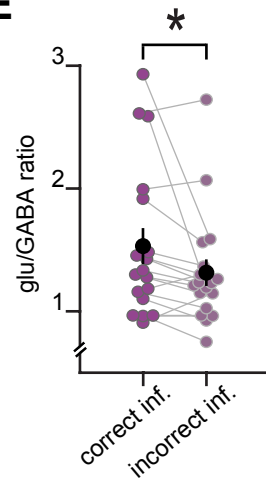**B**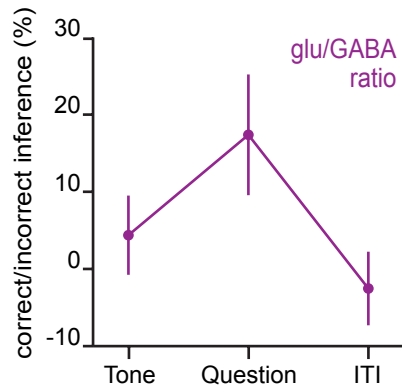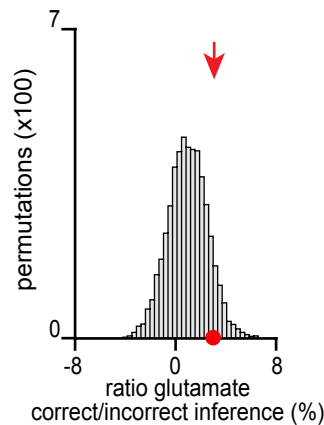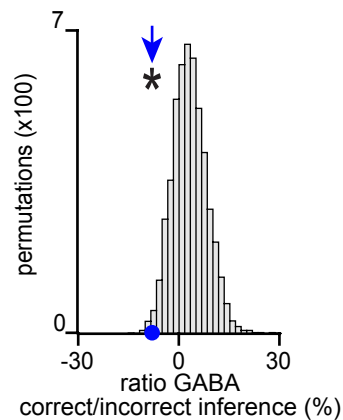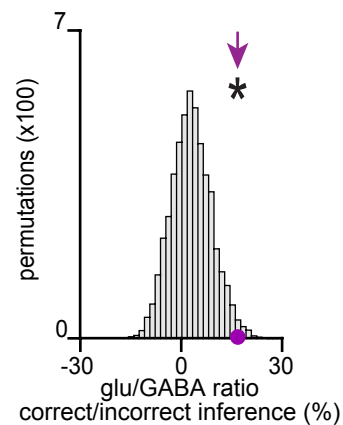

Supplement: supp [file elife_poa_e70071_Figure_4_figure_supplement_5.pdf › elife_poa_e70071_Figure_4_figure_supplement_5.pdf]

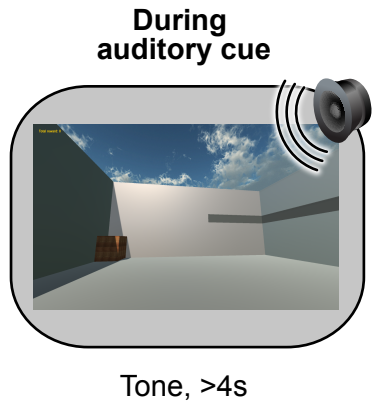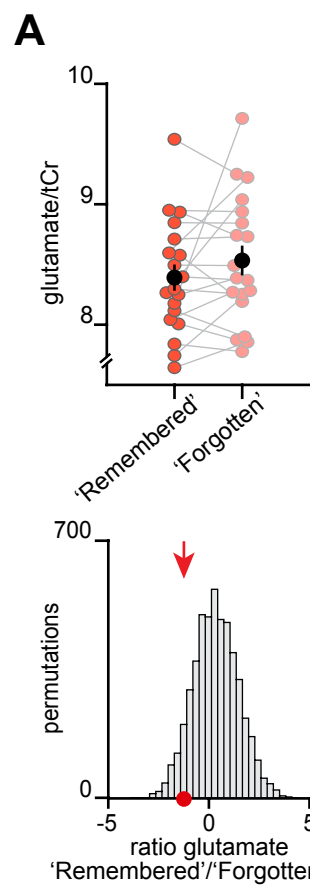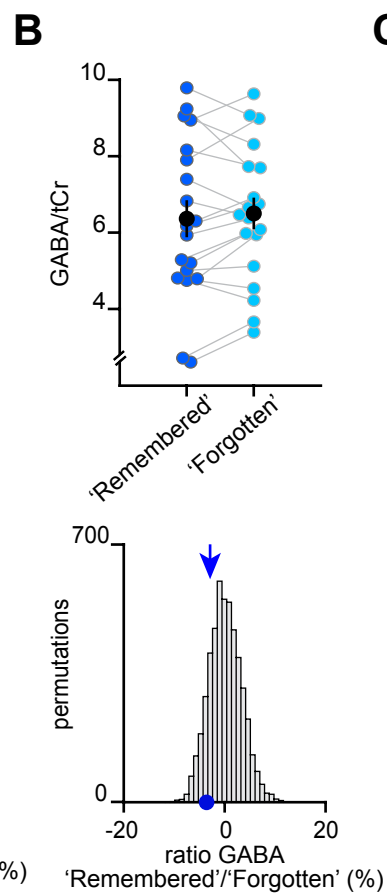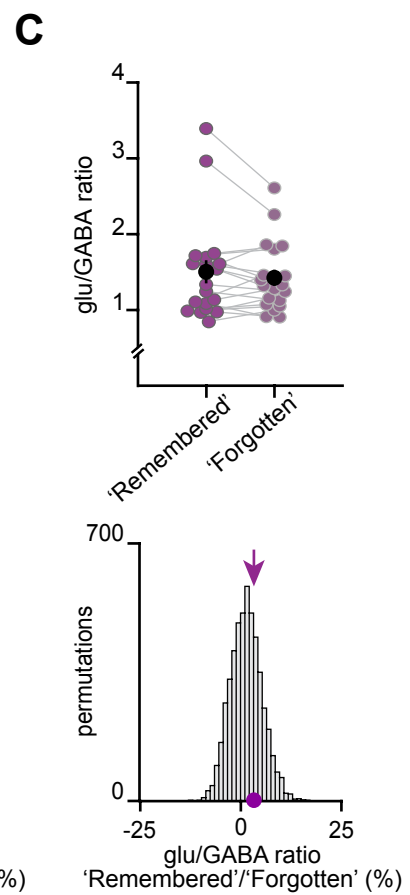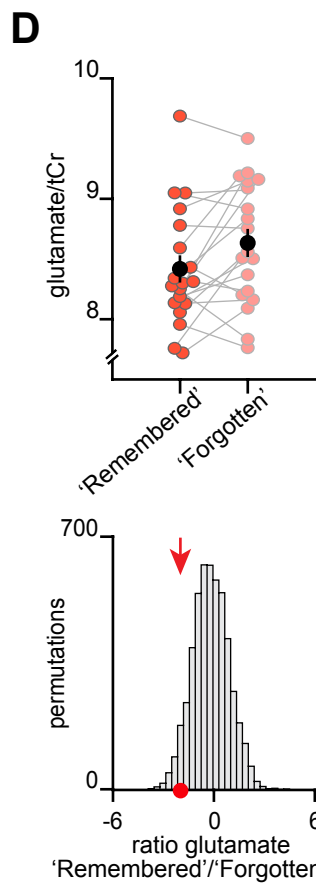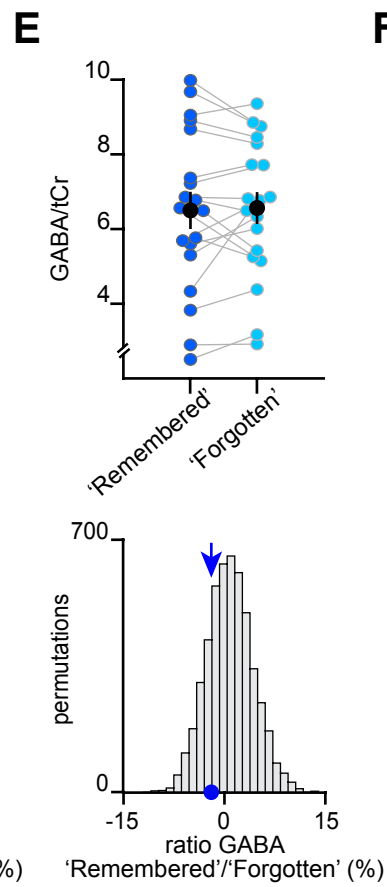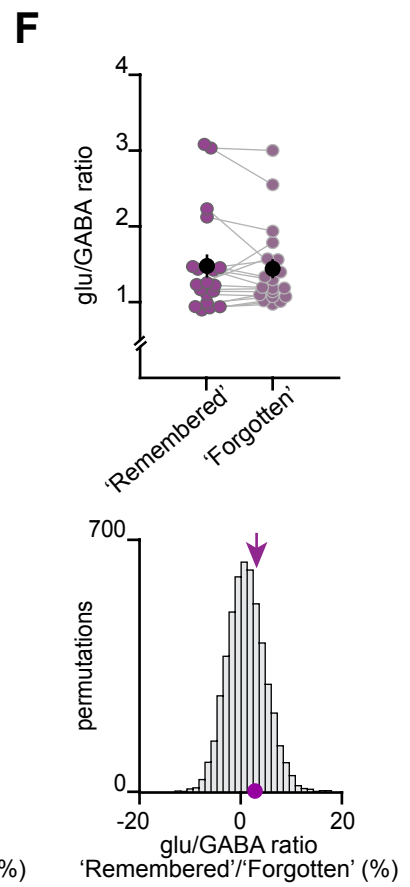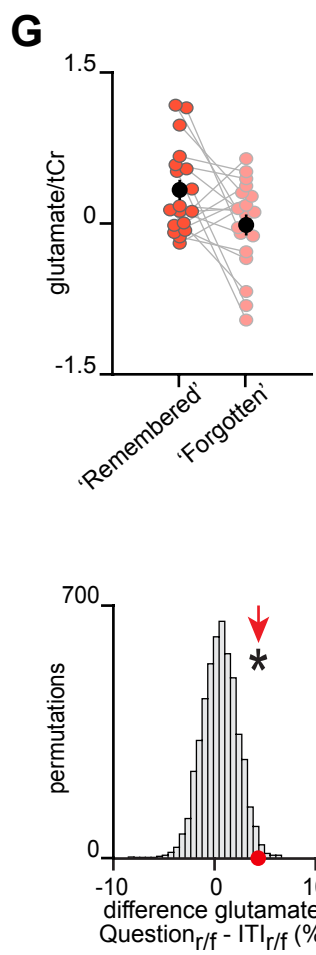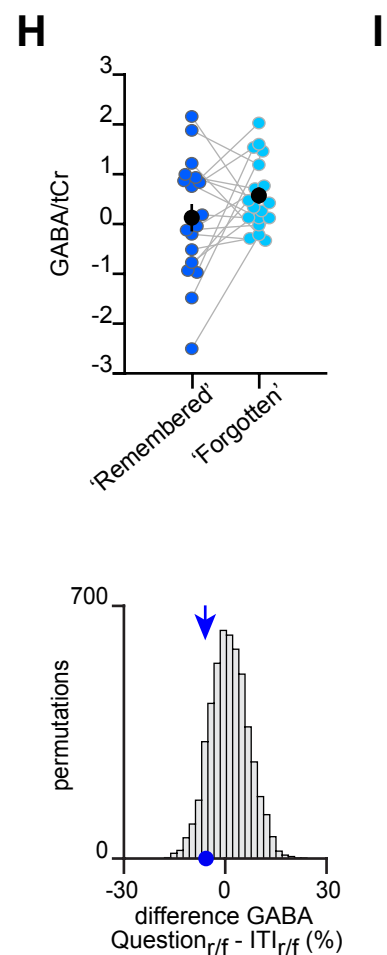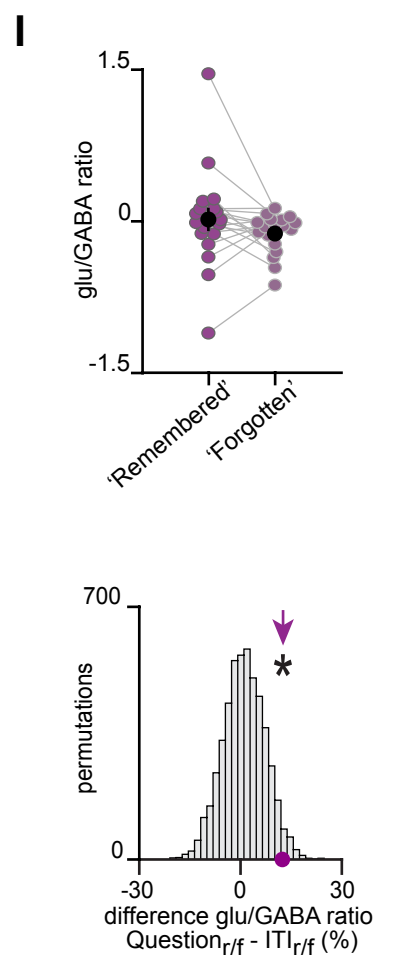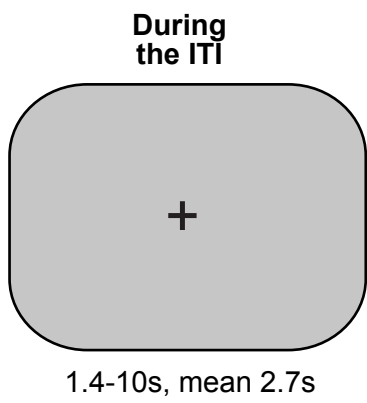

**Difference:  
Question - ITI**

Supplement: supp [file elife_poa_e70071_Figure_4_figure_supplement_6.pdf › elife_poa_e70071_Figure_4_figure_supplement_6.pdf]

**A**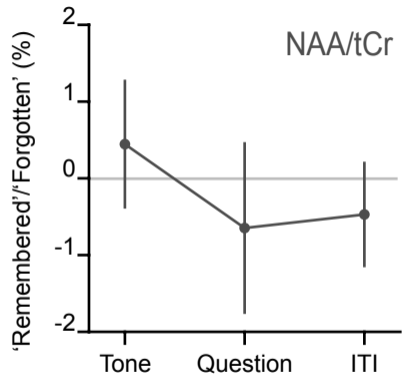**B**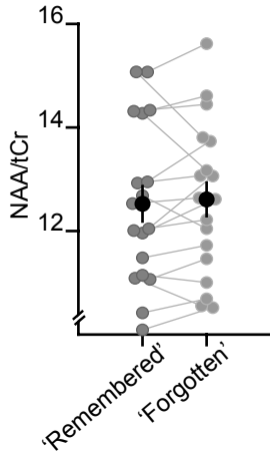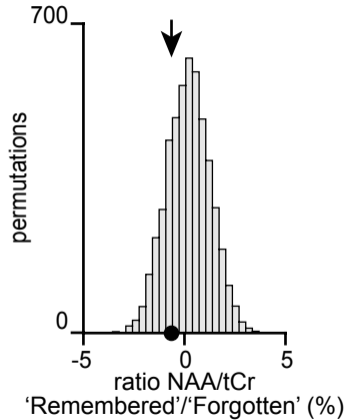

Supplement: supp [file elife_poa_e70071_Figure_4_figure_supplement_7.pdf › elife_poa_e70071_Figure_4_figure_supplement_7.pdf]

**A**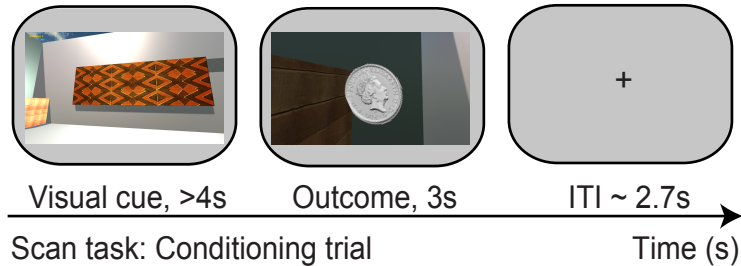**B**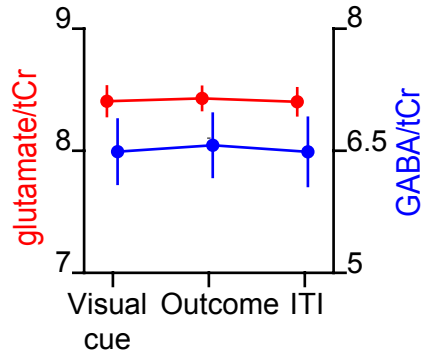**C**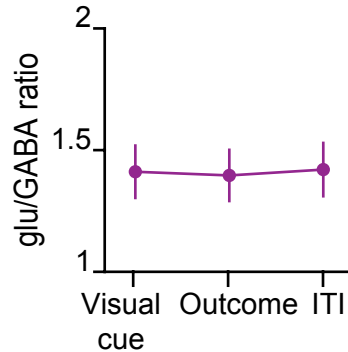

Supplement: supp [file elife_poa_e70071_Figure_4_figure_supplement_8.pdf › elife_poa_e70071_Figure_4_figure_supplement_8.pdf]
